# Supplementary material
Source: PubMed Central journal article supplement (PMC2718294)
Supplement: mmc1.pdf [file mmc1.pdf]

Biophysical Journal, Volume 96

**Supporting Material**

**Cell Shape-Regulation of Smooth Muscle Cell Proliferation**

Rahul G. Thakar, Qian Cheng, Shyam Patel, Julia Chu, Mansoor Nasir, Dorian Liepmann, Kyriakos Komvopoulos, and Song Li

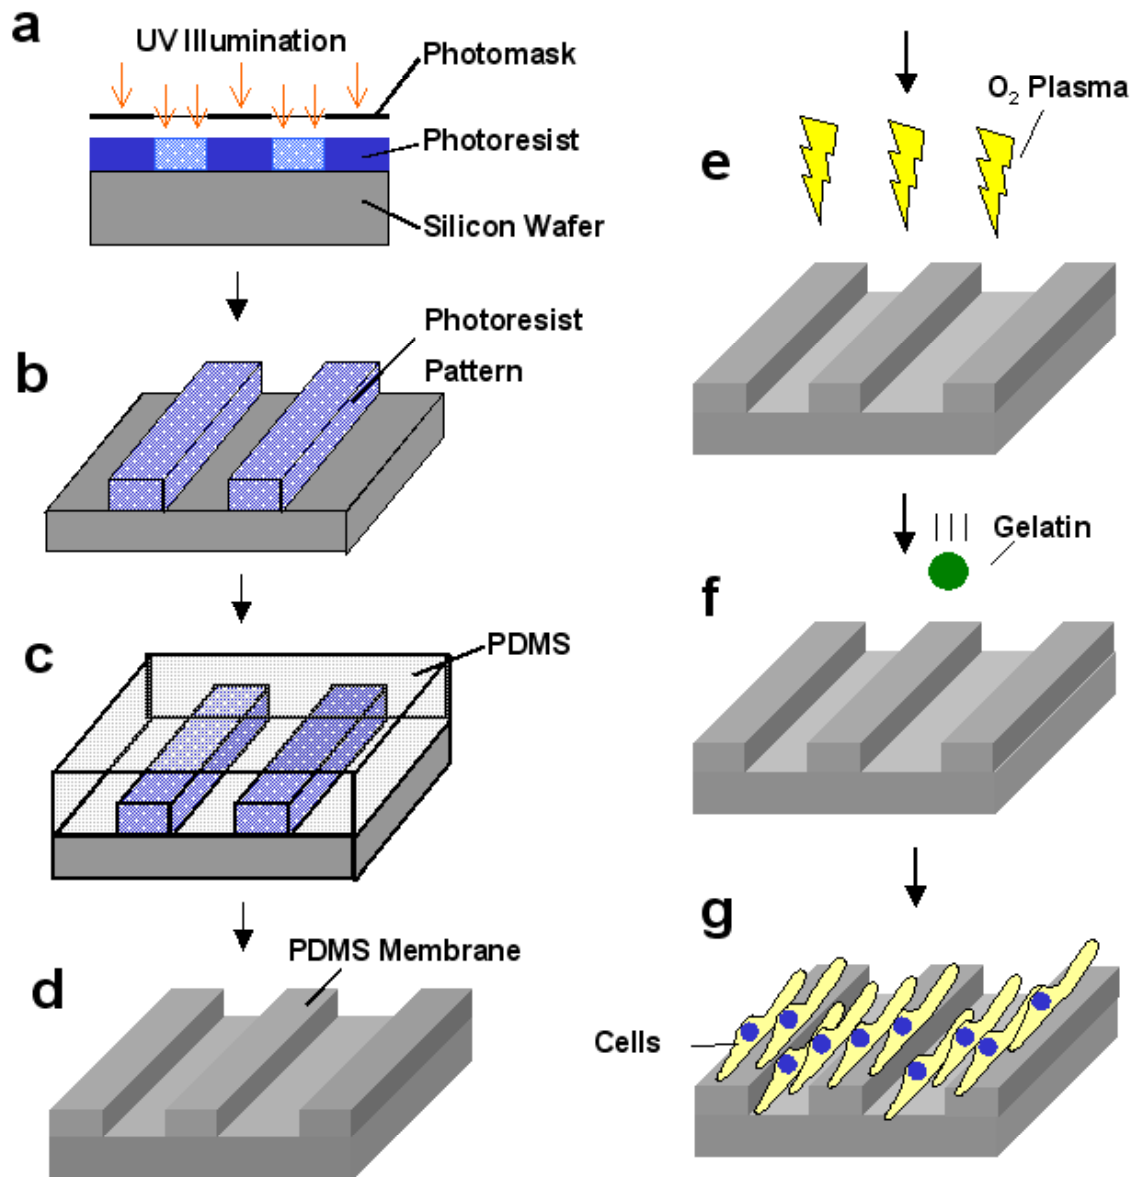

**Supplementary Figure 1.** Procedure for micro patterning topographies and cells. **a.** Positive photoresist was spin-coated on silicon wafer, baked at 90°C for 60 seconds, and exposed to UV light for 11 seconds (at UV Lamp Intensity of 18W/KS) through a photomask with parallel 10- $\mu$ m strips. **b.** After doing a post-bake in 120°C oven for 20 seconds, the wafers were developed in OPD 4262, thus leaving a patterned surface. **c.** PDMS was poured onto the silicon master molds, and spun at 185 RPM for 2 min to ensure that all PDMS membranes would be 250- $\mu$ m thick. **d.** After the PDMS cured, the micropatterned membranes were peeled from the silicon masters molds. Non-pattern PDMS membranes were made in the same manner, except their silicon master molds were blank silicon wafers. The PDMS mold was cleaned in ultrasonic water bath. **e.** PDMS mold was exposed to O<sub>2</sub> plasma to increase its hydrophilicity. **f.** 2% gelatin was used to coat the surface to aid cell adhesion. **g.** SMCs were seeded.

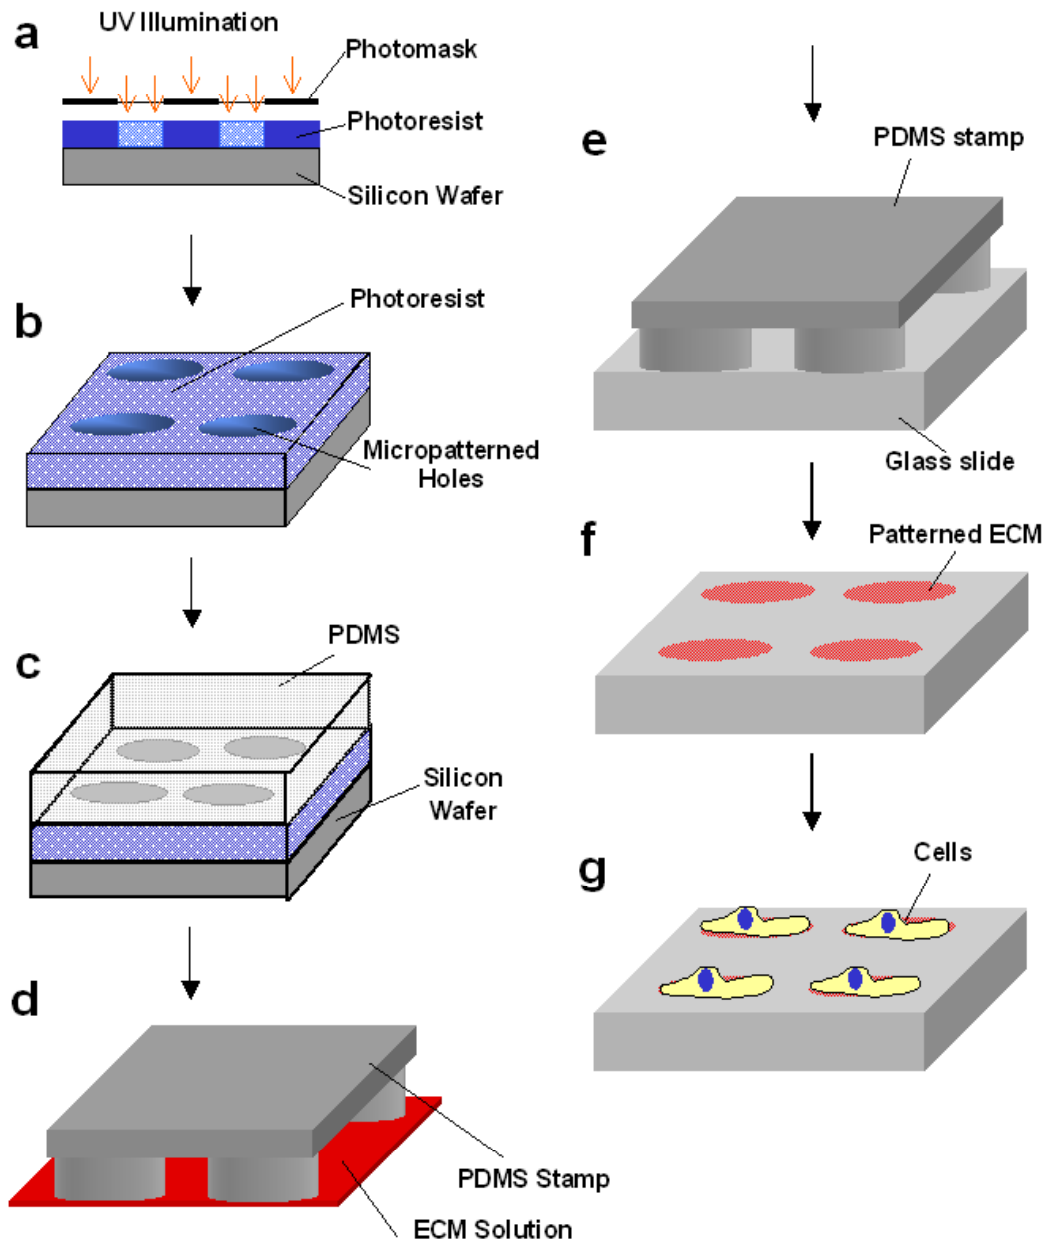

**Supplementary Figure 2.** The microstamping procedure used to create areas of defined adhesion islands. **a.** Positive photoresist was spin-coated on silicon wafer and exposed to UV light through a photomask. **b.** Photoresist was developed thus leaving a patterned surface. **c.** PDMS was cast onto the silicon wafer and cured. **d.** The PDMS stamp was peeled from the silicon mold, washed, cleaned, and dried. An ECM solution was then adsorbed onto microtextured side of the PDMS stamp. **e.** PDMS stamps were incubated with fibronectin solution (0.33 mg/mL), then dried, washed, and placed in conformal contact with di-amino-PEG-sulfo-SANPAH slides. **f.** The PDMS stamp was removed after 30 min and adsorbed fibronectin was crosslinked to the slides by activating the sulfo-SANPAH molecules under UV light for 5 min. The slides were then incubated in phosphate buffered saline (PBS) for 15 minutes at room temperature. Finally, the slides were incubated in 10% glycine (Sigma) in PBS solution (pH 7.4) for 30 minutes to quench active sulfo-SANPAH molecules. **g.** SMCs were seeded on the slides and unbound cells were washed off after 30 – 60 min based on visual observations. One cell per microstamped adhesion island was achieved by titrating the seeding density of cells.

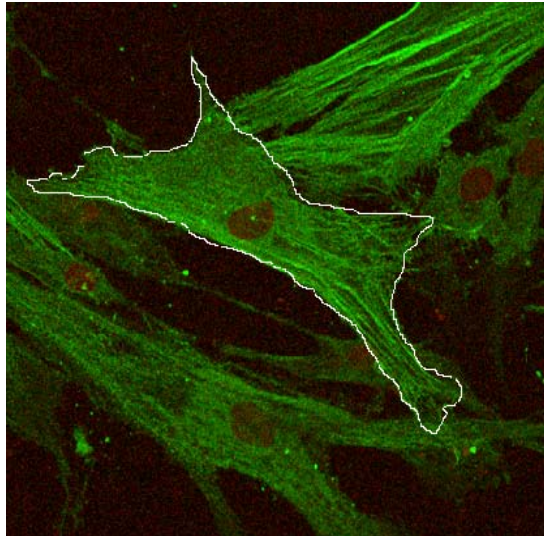

**Supplementary Figure 3.** An example showing the outline of cell boundary for shape analysis. Cells were immunostained for  $\alpha$ -actin, and the outline of cells was used to quantify cell morphology.

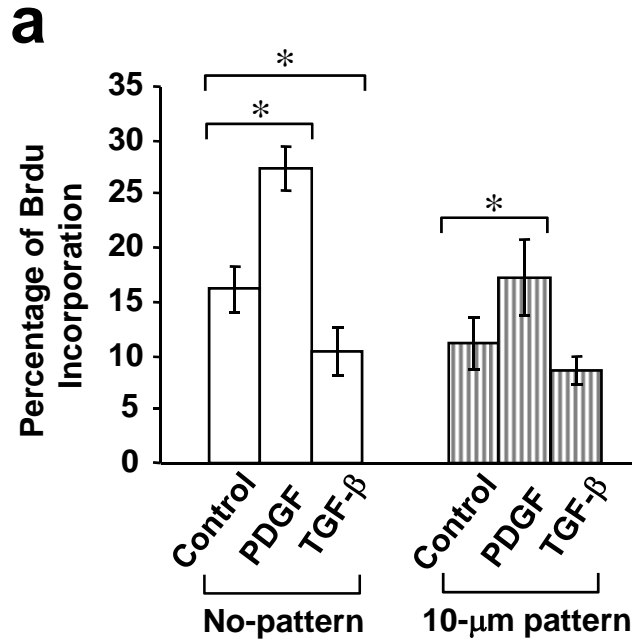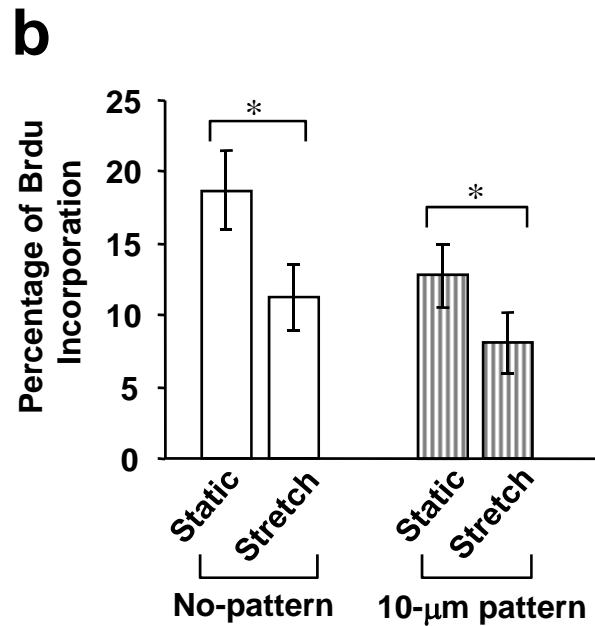

**Supplementary Figure 4.** Effects of growth factors and cyclic uniaxial mechanical strain on SMC proliferation on no-pattern and micropatterned surfaces. **a.** Effects of PDGF and TGF- $\beta$  on SMC proliferation. SMCs were cultured on the no-pattern or micropatterned PDMS for 24 hr, and PDGF (10 ng/ml) or TGF- $\beta$  (10 ng/ml) was added to the medium for another 24 hr culture. Then SMCs were incubated with BrdU for 2 hr. The cells were fixed and doubly stained for BrdU and nuclei. The percentage of BrdU-positive cells (the cells in S phase) was calculated (>200 cells per group). **b.** Effects of cyclic uniaxial mechanical strain on SMC proliferation. SMCs cultured on the no-pattern or micropatterned PDMS were subjected to cyclic (1 Hz) uniaxial mechanical strain (5%) for 24 hr, and the cells were subjected to proliferation analysis as in **a**. In both **a** and **b**, bars represent means  $\pm$  SD. Data were extracted from at least three experiments. \*Statistical significance (at least  $P < 0.05$ ).

**Supplementary Table 1.**Genes with more than 2-fold changes (SMCs on 10- $\mu$ m microgrooves / SMCs on non-pattern surfaces)

| <b>UniGene Name</b>                               | <b>UniGene Symbol</b> | <b>LocusLink ID</b> | <b>Average of fold change</b> |
|---------------------------------------------------|-----------------------|---------------------|-------------------------------|
| nuclear receptor subfamily 4, group A, member 3   | NR4A3 (NOR-1)         | 8013                | 0.289                         |
| heat shock 70kDa protein 6 (HSP70B)               | HSPA6                 | 3310                | 0.291                         |
| chemokine orphan receptor 1                       | CMKOR1                | 57007               | 0.443                         |
| nuclear receptor subfamily 4, group A, member 2   | NR4A2                 | 4929                | 0.448                         |
| radical S-adenosyl methionine domain containing 2 | RSAD2                 | 91543               | 0.485                         |
| chromosome 16 open reading frame 34               | C16orf34              | 90861               | 2.055                         |
| pro-melanin-concentrating hormone                 | PMCH                  | 5367                | 2.135                         |
